# Supplementary material for: The effect of hypoxia on Daphnia magna performance and its associated microbial and bacterioplankton community: A scope for phenotypic plasticity and microbiome community interactions upon environmental stress?
Source: Frontiers journal article supplement (doi:10.3389/fevo.2023.1131203), 2023-04-20
Supplement: Data_Sheet_1.pdf [file Data_Sheet_1.pdf]

## *Supplementary Material*

### **The effect of hypoxia on *Daphnia magna* performance and its associated microbial and bacterioplankton community: a scope for phenotypic plasticity and microbiome community interactions upon environmental stress.**

**Manon Coone<sup>1\*</sup>, Isabel Vanoverberghe<sup>1</sup>, Shira Houwenhuyse<sup>1,2</sup>, Chris Verslype<sup>3</sup>, Ellen Decaestecker<sup>1</sup>**

<sup>1</sup> Laboratory of Aquatic Biology, IRF Life Sciences, Department of Biology, University of Leuven-Campus Kulak, 8500 Kortrijk, Belgium

<sup>2</sup> Laboratory of Microbiology, Department of Biochemistry and Microbiology, Faculty of Sciences, Ghent University, 9000 Gent, Belgium

<sup>3</sup> Clinical Digestive Oncology Laboratory, Department of Gastroenterology and Hepatology, Section of Liver and Biliopancreatic Disorders, University Hospitals Leuven, University of Leuven, 3000 Leuven, Belgium

**\* Correspondence:** Manon Coone: [manon.coone@kuleuven.be](mailto:manon.coone@kuleuven.be)

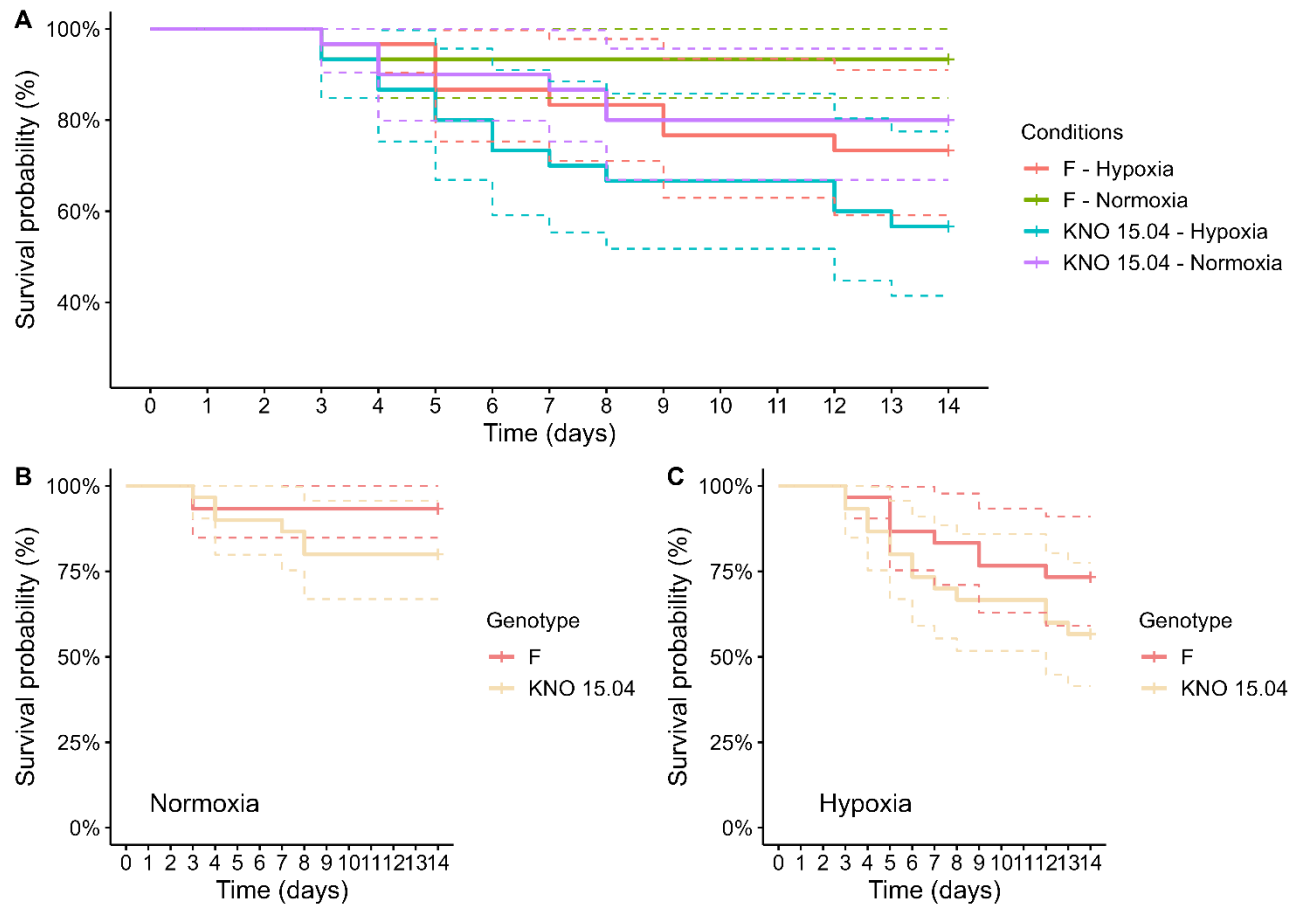

**Supplementary Figure 1.** Comparison of survival of KNO 15.04 and F genotypes in a hypoxia or normoxia environment. (A) Full comparison of the two genotypes and two exposures. Comparison of the F and KNO 15.04 genotypes in (B) normoxia and (C) hypoxia, respectively. Dashed lines represent the 95% confidence intervals. Sample size was  $n=30$  (10 individuals \* 3 replicates) for each genotype \* exposure combination.

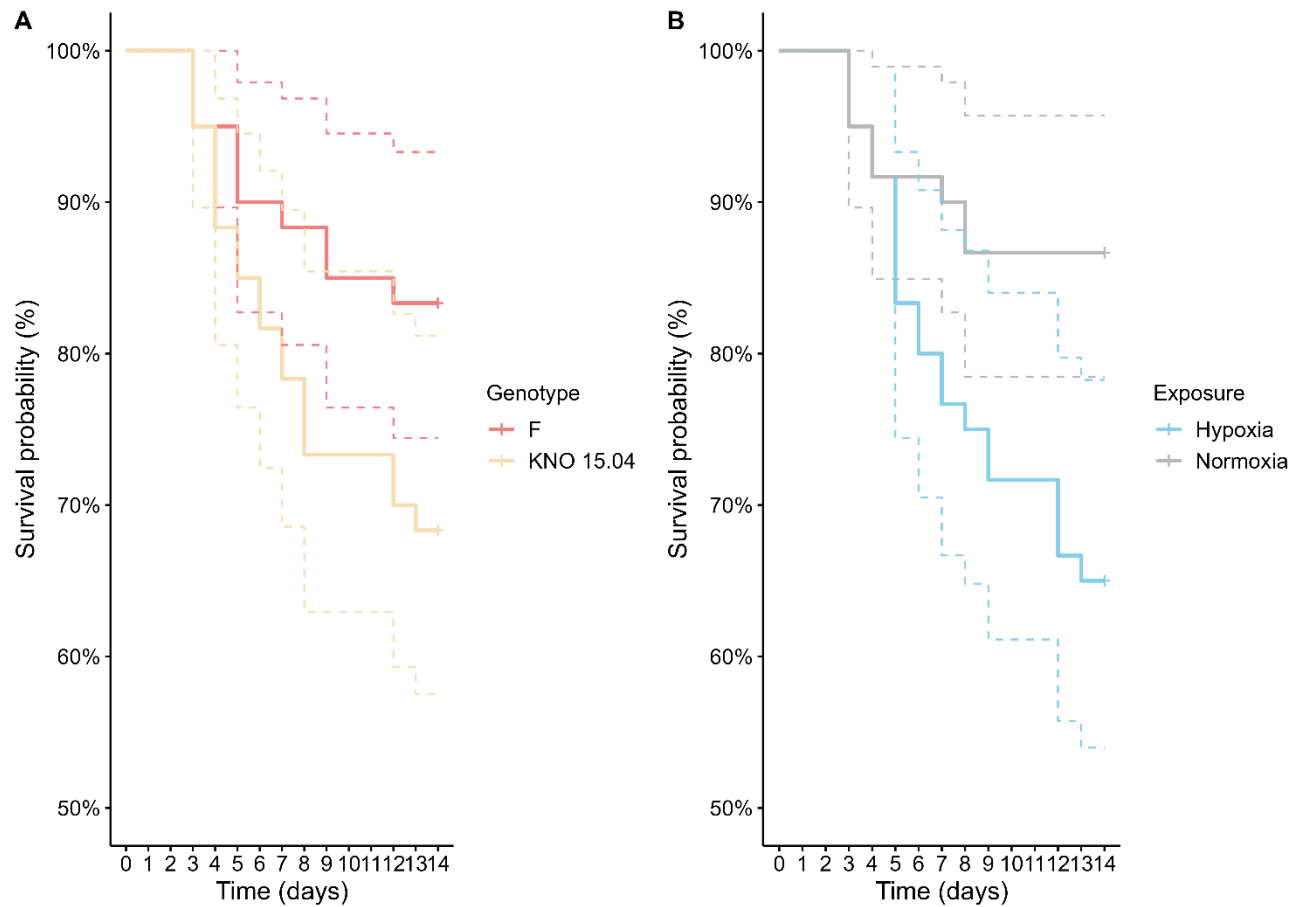

**Supplementary Figure 2.** Comparison of survival of KNO 15.04 and F genotypes in a hypoxia or normoxia environment. (A) Comparison of F and KNO 15.04 genotypes in both exposures. Red lines correspond to survival of the F genotype and orange lines to survival of the KNO 15.04 genotype. (B) Comparison of hypoxia and normoxia exposure over both genotypes. Grey lines correspond to survival in a normoxia exposure and blue lines to survival in a hypoxia exposure. Dashed lines represent the 95% confidence intervals. Sample size was  $n=30$  (10 individuals \* 3 replicates) for each genotype \* exposure combination.

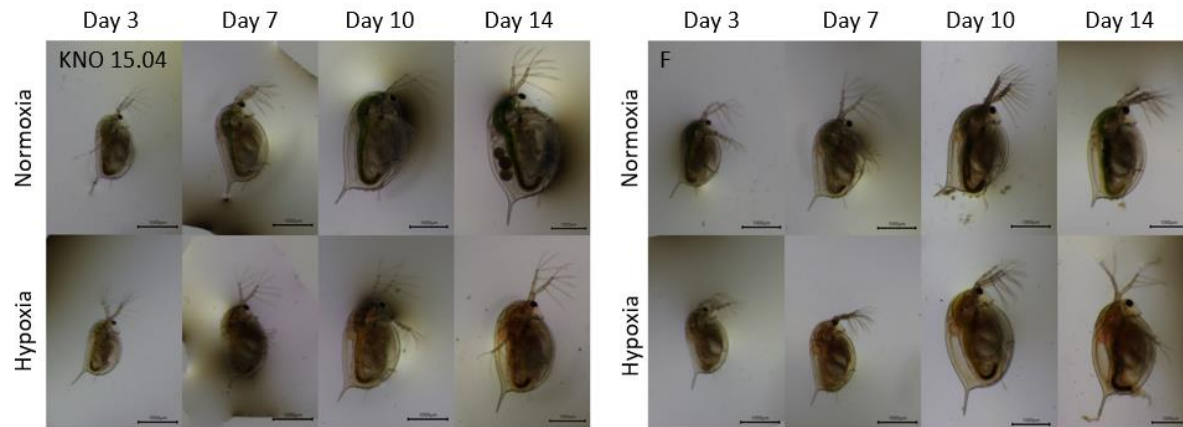

**Supplementary Figure 3.** Phenotypic appearance over time of normoxia (upper panels) and hypoxia (bottom panels) exposed *D. magna* of the KNO 15.04 (left figures) and F (right figures) genotype.

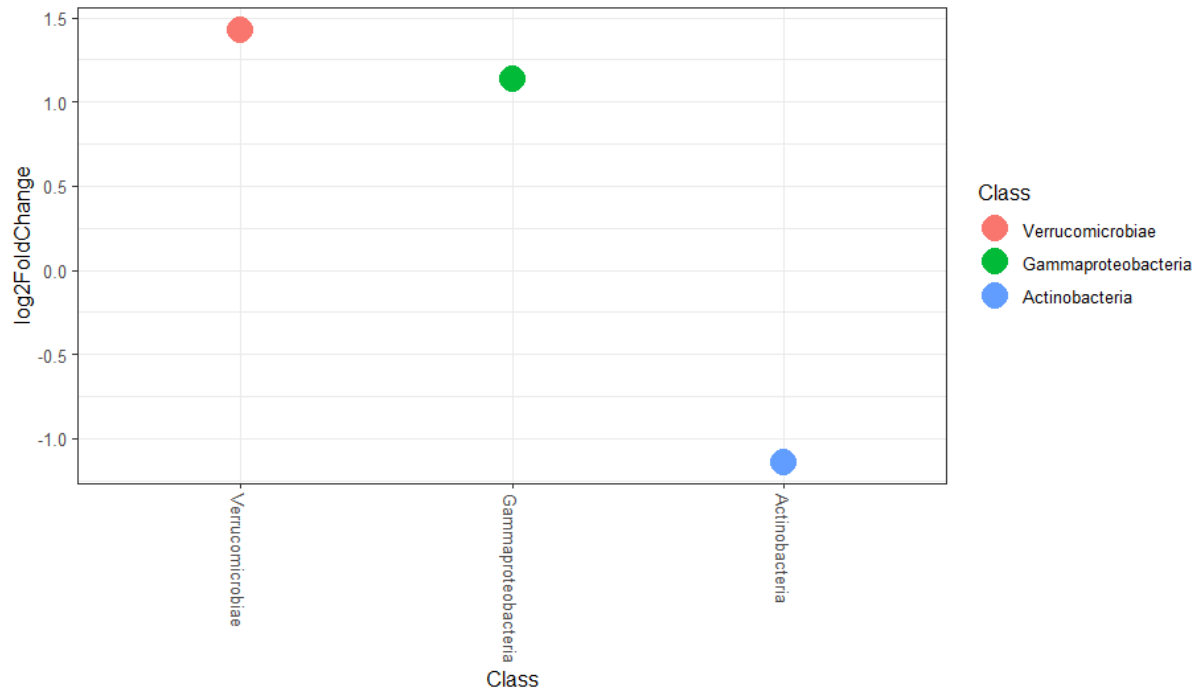

**Supplementary Figure 4.** Deseq2 comparison of classes between normoxia and hypoxia in the bacterioplankton samples with negative log2FoldChange values of bacterial classes being less represented in normoxia.

**A** Bacterial communities: Weighted Unifrac Distance

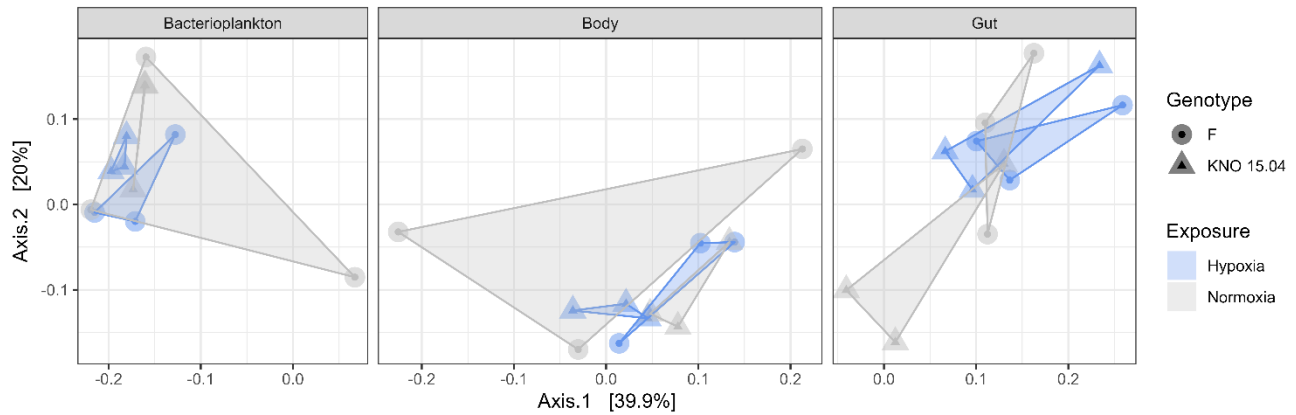

**B** Bacterial communities: Unweighted Unifrac Distance

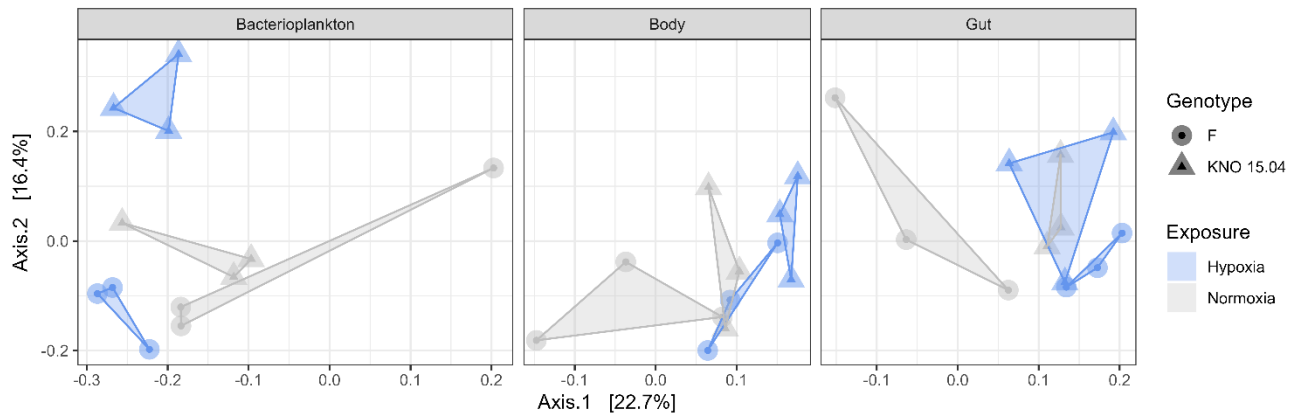

**Supplementary Figure 5.** Beta diversity: (A) Weighted and (B) Unweighted Unifrac distance of the bacterial communities within the different sample types (left panel: bacterioplankton, middle panel: body, right panel: gut). Circles correspond to the F genotype, triangles to the KNO 15.04 genotype. Hypoxia exposure is depicted in blue, normoxia exposure in grey.

**Supplementary Table 1.** Relative mean class counts per sample type x exposure combination. Grey marked and bold numbers are significant different numbers, bold numbers without marking are not significant but interesting numbers.

| Class               | Bacterioplankton   |                    | Body        |                    | Gut         |                    |
|---------------------|--------------------|--------------------|-------------|--------------------|-------------|--------------------|
|                     | Hypoxia            | Normoxia           | Hypoxia     | Normoxia           | Hypoxia     | Normoxia           |
| Bacteroidia         | 49,007452          | <b>48,15794703</b> | 58,47184908 | 55,96729321        | 27,54841169 | <b>44,77306509</b> |
| Gammaproteobacteria | <b>12,80593703</b> | <b>16,24254468</b> | 35,56615448 | 25,7845279         | 48,67385049 | 38,42611634        |
| Actinobacteria      | <b>24,59862856</b> | <b>10,08552273</b> | 0,654258523 | 3,120085215        | 6,699315313 | 3,28761547         |
| Verrucomicrobiae    | <b>10,91930858</b> | <b>23,46311698</b> | 0,456096548 | <b>2,045449712</b> | 2,824877433 | <b>2,367270962</b> |
| Alphaproteobacteria | 1,650147826        | 1,573801194        | 3,274537082 | 12,09568286        | 10,74472269 | 10,64480521        |
| Bdellovibrionia     | 0,537753415        | 0,131309996        | 1,50338234  | 0,457449245        | 3,389427019 | 0,235581352        |
| Polyangia           | 0,038998456        | 0,098920028        | <b>0</b>    | 0,336156013        | <b>0</b>    | 0,102064544        |
| Gracilibacteria     | 0,076225725        | 0,031985075        | 0,073721944 | 0,186336822        | 0,073772256 | 0,036903402        |
| Planctomycetes      | 0,141413974        | 0,170917705        | <b>0</b>    | 0,007019025        | 0,007019211 | 0,063235743        |
| Bacilli             | 0,090206328        | <b>0</b>           | <b>0</b>    | <b>0</b>           | 0,026322444 | 0,005266484        |
| Desulfitobacteriia  | 0,065214918        | <b>0</b>           | <b>0</b>    | <b>0</b>           | 0,012281441 | 0,00351395         |
| Acidimicrobiia      | 0,05989578         | 0,008780248        | <b>0</b>    | <b>0</b>           | <b>0</b>    | 0,001753463        |
| Armatimonadia       | <b>0</b>           | <b>0</b>           | <b>0</b>    | <b>0</b>           | <b>0</b>    | 0,049294039        |
| Kapabacteria        | <b>0</b>           | 0,035154327        | <b>0</b>    | <b>0</b>           | <b>0</b>    | 0,00351395         |
| Oligoflexia         | 0,008817409        | <b>0</b>           | <b>0</b>    | <b>0</b>           | <b>0</b>    | <b>0</b>           |
